# Supplementary material for: Amphiregulin, ST2, and REG3α biomarker risk algorithms as predictors of nonrelapse mortality in patients with acute GVHD
Source: PubMed Central journal article supplement — Blood Adv. 2024 Apr 23;8(12):3284–92. doi: 10.1182/bloodadvances.2023011049 (PMC11226972; doi:10.1182/bloodadvances.2023011049), 2024-04-23
Supplement: BLOODA_ADV-2023-011049-mmc1.pdf [file BLOODA_ADV-2023-011049-mmc1.pdf]

## Table of Contents

|                                                                                                                                                   |    |
|---------------------------------------------------------------------------------------------------------------------------------------------------|----|
| Supplemental Table 1: Participating Centers.....                                                                                                  | 2  |
| Supplemental Table 2: Patient Characteristics .....                                                                                               | 3  |
| Supplemental Table 3: Additional Post-Transplant Cyclophosphamide Prophylaxis Patient Characteristics (validation cohort) .....                   | 5  |
| Supplemental Table 4: Biomarker Algorithms.....                                                                                                   | 7  |
| Supplemental Table 5: Comparison of AUCs between algorithms.....                                                                                  | 8  |
| Supplemental Table 6: Comparison of AUCs between algorithms, systemically treated subset of validation cohort.....                                | 9  |
| Supplemental Table 7: Performance characteristics of all algorithms stratified for risk by the concordance probability threshold.....             | 10 |
| Supplemental Table 8: Cumulative incidence of NRM and relapse and overall survival using concordance probability threshold .....                  | 11 |
| Supplemental Table 9: Day 28 overall response rate using concordance probability threshold, systemically treated subset of validation cohort..... | 12 |
| Supplemental Table 10: Performance characteristics using threshold corresponding to 80% specificity. 13                                           |    |
| Supplemental Table 11: Cumulative incidence of NRM and relapse and overall survival using threshold corresponding to 80% specificity .....        | 14 |
| Supplemental Table 12: Cumulative incidence of NRM by Minnesota Risk, systemically treated subset of validation cohort.....                       | 14 |
| Supplemental Table 13: Area under the curve for algorithms by subsets .....                                                                       | 15 |
| Supplemental Figure 1: Cumulative incidence of 12-month NRM using risk groups identified by published algorithms and accompanying thresholds..... | 16 |
| Supplemental Figure 2: Correlation of predicted probabilities of AREG, REG3 $\alpha$ , and ST2 algorithms in the training cohort. ....            | 17 |

**Supplemental Table 1: Participating Centers**

|                                                          | Training (n=341) | Validation (n=374) |
|----------------------------------------------------------|------------------|--------------------|
| Bambino Gesu Children's Hospital (Rome, Italy)           | 0                | 18                 |
| Children's Hospital Los Angeles                          | 0                | 7                  |
| City of Hope Comprehensive Cancer Center (Duarte, CA)    | 0                | 11                 |
| Columbia University Medical Center (New York, NY)        | 0                | 4                  |
| Emory University (Atlanta, GA)                           | 4                | 18                 |
| Hospital for Sick Children (Toronto, ON)                 | 0                | 1                  |
| Icahn School of Medicine at Mount Sinai (New York, NY)   | 17               | 34                 |
| King Chulalongkorn Memorial Hospital (Bangkok, Thailand) | 7                | 2                  |
| Mayo Clinic (Rochester, MN)                              | 21               | 23                 |
| Massachusetts General Hospital (Boston, MA)              | 0                | 36                 |
| Ohio State University                                    | 21               | 57                 |
| University Hospital Carl Gustav Carus Dresden            | 9                | 1                  |
| University of Erlangen                                   | 0                | 31                 |
| University of Hamburg                                    | 41               | 38                 |
| University of Michigan                                   | 168              | 4                  |
| University of Pennsylvania                               | 11               | 20                 |
| University of Regensburg                                 | 32               | 36                 |
| University of Wurzburg                                   | 10               | 11                 |
| Vanderbilt University (Nashville, TN)                    | 0                | 22                 |

**Supplemental Table 2: Patient Characteristics**

| Characteristic                         | Training (n = 341)<br>2004-2015 | Validation (n = 374)<br>2015-2017 | P-value |
|----------------------------------------|---------------------------------|-----------------------------------|---------|
| Median Age - yr (range)                | 53 (0-75)                       | 53 (0-74)                         | 0.65    |
| Age (years) – n (%)                    |                                 |                                   | 0.002   |
| <18                                    | 36 (11%)                        | 56 (15%)                          |         |
| 18-60 yrs                              | 229 (67%)                       | 203 (54%)                         |         |
| >60                                    | 76 (22%)                        | 115 (31%)                         |         |
| Indication for HCT - n (%)             |                                 |                                   | 0.001   |
| Acute leukemia                         | 184 (54%)                       | 196 (52%)                         |         |
| MDS/MPS                                | 69 (20%)                        | 109 (29%)                         |         |
| Lymphoma                               | 44 (13%)                        | 31 (8%)                           |         |
| Non-malignant                          | 11 (3%)                         | 21 (6%)                           |         |
| Other malignant                        | 33 (10%)                        | 17 (5%)                           |         |
| Conditioning Regimen Intensity - n (%) |                                 |                                   | 0.006   |
| Myeloablative                          | 236 (69%)                       | 221 (59%)                         |         |
| Reduced Intensity/non-myeloablative    | 105 (31%)                       | 153 (41%)                         |         |
| Donor type - n (%)                     |                                 |                                   |         |
| Related                                | 96 (28%)                        | 94 (25%)                          | <0.001  |
| Unrelated                              | 237 (70%)                       | 243 (65%)                         |         |
| Haploidentical                         | 8 (2%)                          | 37 (10%)                          |         |
| HLA-match - n (%)                      |                                 |                                   | <0.001  |
| Matched                                | 250 (73%)                       | 267 (71%)                         |         |
| Mismatched                             | 83 (24%)                        | 70 (19%)                          |         |
| Haploidentical                         | 8 (2%)                          | 37 (10%)                          |         |
| GVHD serotherapy - n (%)               |                                 |                                   | <0.001  |
| ATG                                    | 100 (29%)                       | 159 (42%)                         |         |
| No ATG                                 | 241 (71%)                       | 215 (58%)                         |         |
| GVHD prophylaxis - n (%)               |                                 |                                   | <0.001  |
| CNI/MTX ± other                        | 199 (58%)                       | 204 (54%)                         |         |
| CNI/MMF ± other                        | 121 (36%)                       | 86 (23%)                          |         |
| Tac + Sirolimus                        | 1 (<1%)                         | 10 (3%)                           |         |
| Cyclophosphamide based                 | 17 (5%)                         | 56 (15%)                          |         |
| T cell depletion                       | 1 (<1%)                         | 14 (4%)                           |         |
| Other                                  | 2 (1%)                          | 4 (1%)                            |         |
| Stem cell source - n (%)               |                                 |                                   | 0.22    |
| Marrow                                 | 48 (14%)                        | 67 (18%)                          |         |
| Peripheral blood                       | 262 (77%)                       | 282 (75%)                         |         |
| Cord                                   | 31 (9%)                         | 25 (7%)                           |         |
| Diagnosis GVHD: median day (range)     | 26 (7-273)                      | 28 (5-196)                        | <0.001  |
| Late-onset GVHD, n (%)                 | 9 (2.6%)                        | 35 (9.3%)                         | <0.001  |

|                                        |     |           |             |       |
|----------------------------------------|-----|-----------|-------------|-------|
| Diagnosis GVHD Grade - n (%)           |     |           |             | 0.98  |
| Grade I*                               |     | 146 (43%) | 159 (42%)   |       |
| Grade II                               |     | 134 (39%) | 147 (39%)   |       |
| Grade III                              |     | 51 (15%)  | 55 (15%)    |       |
| Grade IV                               |     | 10 (3%)   | 13 (4%)     |       |
| Minnesota Risk at Dx - n (%)           |     |           |             | 0.682 |
| Standard                               |     | 288 (84%) | 321 (86%)   |       |
| High                                   |     | 53 (16%)  | 53 (14)     |       |
| Target Organ Involvement at Dx - n (%) |     |           |             | 0.34  |
| LGI+/-other                            |     | 109 (32%) | 109 (29%)   |       |
| Liver only                             |     | 2 (<1%)   | 4 (1%)      |       |
| Skin only                              |     | 191 (56%) | 199 (53%)   |       |
| UGI only                               |     | 23 (7%)   | 36 (10%)    |       |
| Other                                  |     | 16 (5%)   | 26 (7%)     |       |
| Maximum GVHD Grade III-IV, n (%)       |     | 129 (38%) | 116 (31%)   | 0.07  |
| Systemic treatment- n (%)              |     |           |             | 0.28  |
|                                        | Yes | 302 (89%) | 321 (88%)** |       |
|                                        | No  | 39 (11%)  | 53 (14%)    |       |
| 12-month NRM (%)                       |     | 24%       | 19%         | 0.08  |

ATG, anti-thymocyte globulin; CNI, calcineurin inhibitor; Dx, diagnosis; LGI, lower GI; MDS, myelodysplastic syndrome; MMF, mycophenolate mofetil; MPS, myeloproliferative syndrome; MTX, methotrexate; Tac, tacrolimus; UGI, upper GI.

\*Includes 1 patient with biopsy-proven liver GVHD and total bilirubin <2 mg/dl.

\*\* Includes 2 patients treated with sirolimus monotherapy

**Supplemental Table 3: Additional Post-Transplant Cyclophosphamide Prophylaxis Patient Characteristics (validation cohort)**

| <b>Characteristic</b>                  | <b>(n =77)<br/>2020-2022</b> |
|----------------------------------------|------------------------------|
| Median Age - yr (range)                | 59 (6-74)                    |
| Age (years) – n (%)                    |                              |
| <18                                    | 4 (5%)                       |
| 18-60 yrs                              | 38 (49%)                     |
| >60                                    | 35 (46%)                     |
| Indication for HCT - n (%)             |                              |
| Acute leukemia                         | 35 (46%)                     |
| MDS/MPS                                | 21 (27%)                     |
| Lymphoma                               | 7 (9%)                       |
| Non-malignant                          | 6 (8%)                       |
| Other malignant                        | 8 (10%)                      |
| Conditioning Regimen Intensity - n (%) |                              |
| Myeloablative                          | 49 (64%)                     |
| Reduced Intensity/non-myeloablative    | 28 (36%)                     |
| Donor type - n (%)                     |                              |
| Related                                | 46 (60%)                     |
| Unrelated                              | 31 (40%)                     |
| Haploidentical                         |                              |
| HLA-match - n (%)                      |                              |
| Matched                                | 17 (22%)                     |
| Mismatched                             | 15 (20%)                     |
| Haploidentical                         | 45 (58%)                     |
| GVHD serotherapy - n (%)               |                              |
| ATG                                    | 8 (10%)                      |
| No ATG                                 | 69 (90%)                     |
| GVHD prophylaxis - n (%)               |                              |
| Cyclophosphamide based                 | 77 (100%)                    |
| Stem cell source - n (%)               |                              |
| Marrow                                 | 17 (22%)                     |
| Peripheral blood                       | 60 (78%)                     |
| Diagnosis GVHD: median day (range)     | 37 (5-105)                   |
| Late-onset GVHD, n (%)                 | 1 (1%)                       |
| Diagnosis GVHD Grade - n (%)           |                              |
| Grade I                                | 30 (39%)                     |
| Grade II                               | 32 (41%)                     |
| Grade III                              | 12 (16%)                     |
| Grade IV                               | 3 (4%)                       |

|                                        |     |           |
|----------------------------------------|-----|-----------|
| Minnesota Risk at Dx - n (%)           |     |           |
| Standard                               |     | 65 (84%)  |
| High                                   |     | 12 (16%)  |
| Target Organ Involvement at Dx - n (%) |     |           |
| LGI+/-other                            |     | 29 (38%)  |
| Liver only                             |     | 2 (3%)    |
| Skin only                              |     | 43 (56%)  |
| UGI only                               |     | 2 (3%)    |
| Other                                  |     | 1 (1%)    |
| Maximum GVHD Grade III-IV, n (%)       |     | 24 (31%)  |
| Systemic treatment- n (%)              |     |           |
|                                        | Yes | 77 (100%) |
| 12-month NRM (%)                       |     | 18%       |

**Supplemental Table 4: Biomarker Algorithms**

|                                               | <b>Algorithm</b>                                                                                                                     | <b>P value*</b>              |                          |
|-----------------------------------------------|--------------------------------------------------------------------------------------------------------------------------------------|------------------------------|--------------------------|
| <b>ST2</b>                                    | $\log[-\log(1 - \hat{p})] = -7.836 + 1.4127 \log_{10} \text{ST2}$                                                                    | ST2                          | <0.001                   |
| <b>REG3<math>\alpha</math></b>                | $\log[-\log(1 - \hat{p})] = -3.0284 + 0.9749 \log_{10} \text{REG3}\alpha$                                                            | REG3 $\alpha$                | <0.001                   |
| <b>AREG</b>                                   | $\log[-\log(1 - \hat{p})] = -2.7919 + 1.1743 \log_{10} \text{AREG}$                                                                  | AREG                         | <0.001                   |
| <b>ST2+AREG</b>                               | $\log[-\log(1 - \hat{p})] = -5.7536 + 0.7001 \log_{10} \text{ST2} + 0.9543 \log_{10} \text{AREG}$                                    | ST2<br>AREG                  | 0.021<br><0.001          |
| <b>ST2+REG3<math>\alpha</math></b>            | $\log[-\log(1 - \hat{p})] = -7.3272 + 1.0205 \log_{10} \text{ST2} + 0.7312 \log_{10} \text{REG3}\alpha$                              | ST2<br>REG3 $\alpha$         | <0.001<br><0.001         |
| <b>REG3<math>\alpha</math>+AREG</b>           | $\log[-\log(1 - \hat{p})] = -3.5277 + 0.5731 \log_{10} \text{REG3}\alpha + 0.947 \log_{10} \text{AREG}$                              | REG3 $\alpha$<br>AREG        | 0.002<br><0.001          |
| <b>ST2+ REG3<math>\alpha</math>+<br/>AREG</b> | $\log[-\log(1 - \hat{p})] = -5.6647 + 0.53 \log_{10} \text{ST2} + 0.4957 \log_{10} \text{REG3}\alpha + 0.8075 \log_{10} \text{AREG}$ | ST2<br>REG3 $\alpha$<br>AREG | 0.088<br>0.009<br><0.001 |

\* p-values represent the statistical significance for each biomarker in the model in the training cohort

**Supplemental Table 5: Comparison of AUCs between algorithms**

Key algorithms are **bolded** (validation cohort, n=374)

| Reference AUC                                   | Comparator AUC                                  | Adjusted P value |
|-------------------------------------------------|-------------------------------------------------|------------------|
| <b>AREG</b> (0.707)                             | <b>ST2+REG3<math>\alpha</math></b> (0.757)      | 0.23             |
|                                                 | <b>ST2+REG3<math>\alpha</math>+AREG</b> (0.752) | 0.15             |
|                                                 | ST2 (0.710)                                     | 0.97             |
|                                                 | REG3 $\alpha$ (0.711)                           | 0.97             |
|                                                 | ST2+AREG (0.734)                                | 0.23             |
|                                                 | REG3 $\alpha$ +AREG (0.736)                     | 0.23             |
| <b>ST2+REG3<math>\alpha</math></b> (0.757)      | <b>ST2+REG3<math>\alpha</math>+AREG</b> (0.752) | 0.94             |
|                                                 | ST2 (0.710)                                     | 0.23             |
|                                                 | REG3 $\alpha$ (0.711)                           | 0.23             |
|                                                 | ST2+AREG (0.734)                                | 0.50             |
|                                                 | REG3 $\alpha$ +AREG (0.736)                     | 0.50             |
| <b>ST2+REG3<math>\alpha</math>+AREG</b> (0.752) | ST2 (0.710)                                     | 0.32             |
|                                                 | REG3 $\alpha$ (0.711)                           | 0.23             |
|                                                 | ST2+AREG (0.734)                                | 0.32             |
|                                                 | REG3 $\alpha$ +AREG (0.736)                     | 0.23             |
| ST2 (0.710)                                     | REG3 $\alpha$ (0.711)                           | 0.97             |
|                                                 | ST2+AREG (0.734)                                | 0.50             |
|                                                 | REG3 $\alpha$ +AREG (0.736)                     | 0.64             |
| REG3 $\alpha$ (0.711)                           | ST2+AREG (0.734)                                | 0.64             |
|                                                 | REG3 $\alpha$ +AREG (0.736)                     | 0.50             |
| ST2+AREG (0.734)                                | REG3 $\alpha$ +AREG (0.736)                     | 0.97             |

The false discovery rate (FDR) approach was used for multiplicity adjustment



**Supplemental Table 6: Comparison of AUCs between algorithms, systemically treated subset of validation cohort**

Key algorithms are **bolded** (n=321)

| Reference AUC                                   | Comparator AUC                                  | Adjusted P value |
|-------------------------------------------------|-------------------------------------------------|------------------|
| <b>AREG</b> (0.693)                             | <b>ST2+REG3<math>\alpha</math></b> (0.739)      | 0.39             |
|                                                 | <b>ST2+REG3<math>\alpha</math>+AREG</b> (0.735) | 0.39             |
|                                                 | ST2 (0.694)                                     | 0.99             |
|                                                 | REG3 $\alpha$ (0.698)                           | 0.96             |
|                                                 | ST2+AREG (0.718)                                | 0.39             |
|                                                 | REG3 $\alpha$ +AREG (0.721)                     | 0.39             |
| <b>ST2+REG3<math>\alpha</math></b> (0.739)      | <b>ST2+REG3<math>\alpha</math>+AREG</b> (0.735) | 0.96             |
|                                                 | ST2 (0.694)                                     | 0.39             |
|                                                 | REG3 $\alpha$ (0.698)                           | 0.39             |
|                                                 | ST2+AREG (0.718)                                | 0.59             |
|                                                 | REG3 $\alpha$ +AREG (0.721)                     | 0.65             |
| <b>ST2+REG3<math>\alpha</math>+AREG</b> (0.735) | ST2 (0.694)                                     | 0.39             |
|                                                 | REG3 $\alpha$ (0.698)                           | 0.39             |
|                                                 | ST2+AREG (0.718)                                | 0.39             |
|                                                 | REG3 $\alpha$ +AREG (0.721)                     | 0.39             |
| ST2 (0.694)                                     | REG3 $\alpha$ (0.698)                           | 0.96             |
|                                                 | ST2+AREG (0.718)                                | 0.59             |
|                                                 | REG3 $\alpha$ +AREG (0.721)                     | 0.66             |
| REG3 $\alpha$ (0.698)                           | ST2+AREG (0.718)                                | 0.76             |
|                                                 | REG3 $\alpha$ +AREG (0.721)                     | 0.59             |
| ST2+AREG (0.718)                                | REG3 $\alpha$ +AREG (0.721)                     | 0.96             |

The false discovery rate (FDR) approach was used for multiplicity adjustment

**Supplemental Table 7: Performance characteristics of all algorithms stratified for risk by the concordance probability threshold**

|                                                |                                         | Threshold | % High Risk | Sensitivity | Specificity | PPV  | NPV  | Balanced accuracy | Correctly classified |
|------------------------------------------------|-----------------------------------------|-----------|-------------|-------------|-------------|------|------|-------------------|----------------------|
| <b>Validation cohort<br/>(n=374)</b>           | <b>AREG</b>                             | 0.231     | 45%         | 0.69        | 0.61        | 0.29 | 0.89 | 0.65              | 62%                  |
|                                                | <b>ST2+REG3<math>\alpha</math></b>      | 0.247     | 30%         | 0.63        | 0.77        | 0.39 | 0.90 | 0.70              | 75%                  |
|                                                | <b>ST2+REG3<math>\alpha</math>+AREG</b> | 0.204     | 48%         | 0.77        | 0.59        | 0.30 | 0.92 | 0.68              | 60%                  |
|                                                | ST2                                     | 0.225     | 30%         | 0.59        | 0.77        | 0.37 | 0.89 | 0.68              | 73%                  |
|                                                | REG3 $\alpha$                           | 0.223     | 52%         | 0.77        | 0.54        | 0.28 | 0.91 | 0.66              | 58%                  |
|                                                | ST2+AREG                                | 0.191     | 53%         | 0.76        | 0.52        | 0.27 | 0.90 | 0.64              | 56%                  |
|                                                | REG3 $\alpha$ +AREG                     | 0.235     | 46%         | 0.74        | 0.61        | 0.30 | 0.91 | 0.68              | 63%                  |
|                                                |                                         | Threshold | % High Risk | Sensitivity | Specificity | PPV  | NPV  | Balanced accuracy | Correctly classified |
| <b>Systemically treated<br/>subset (n=321)</b> | <b>AREG</b>                             | 0.231     | 47%         | 0.68        | 0.59        | 0.31 | 0.87 | 0.63              | 61%                  |
|                                                | <b>ST2+REG3<math>\alpha</math></b>      | 0.247     | 34%         | 0.62        | 0.74        | 0.39 | 0.88 | 0.68              | 71%                  |
|                                                | <b>ST2+REG3<math>\alpha</math>+AREG</b> | 0.204     | 52%         | 0.77        | 0.55        | 0.32 | 0.90 | 0.66              | 60%                  |
|                                                | ST2                                     | 0.225     | 33%         | 0.59        | 0.74        | 0.39 | 0.87 | 0.67              | 71%                  |
|                                                | REG3 $\alpha$                           | 0.223     | 55%         | 0.77        | 0.50        | 0.30 | 0.89 | 0.64              | 56%                  |
|                                                | ST2+AREG                                | 0.191     | 56%         | 0.75        | 0.49        | 0.29 | 0.88 | 0.62              | 55%                  |
|                                                | REG3 $\alpha$ +AREG                     | 0.235     | 49%         | 0.74        | 0.58        | 0.32 | 0.89 | 0.66              | 61%                  |

**Supplemental Table 8: Cumulative incidence of NRM and relapse and overall survival using concordance probability threshold**

|                                            |                                         | CI 6 Month NRM | P-value* | CI 12 Month NRM | P-value* | CI 12 Month Relapse | P-value* | 12 Month OS | P-value** |
|--------------------------------------------|-----------------------------------------|----------------|----------|-----------------|----------|---------------------|----------|-------------|-----------|
| <b>Validation cohort (n=374)</b>           | <b>AREG</b>                             | 6% vs 24%      | <0.001   | 11% vs 29%      | <0.001   | 16% vs 12%          | 0.334    | 81% vs 64%  | <0.001    |
|                                            | <b>ST2+REG3<math>\alpha</math></b>      | 5% vs 35%      | <0.001   | 10% vs 39%      | <0.001   | 15% vs 11%          | 0.338    | 82% vs 52%  | <0.001    |
|                                            | <b>ST2+REG3<math>\alpha</math>+AREG</b> | 4% vs 25%      | <0.001   | 8% vs 30%       | <0.001   | 14% vs 13%          | 0.287    | 84% vs 61%  | <0.001    |
|                                            | <b>ST2</b>                              | 7% vs 32%      | <0.001   | 11% vs 37%      | <0.001   | 14% vs 14%          | 0.424    | 81% vs 54%  | <0.001    |
|                                            | <b>REG3<math>\alpha</math></b>          | 9% vs 23%      | <0.001   | 9% vs 28%       | <0.001   | 17% vs 11%          | 0.274    | 83% vs 65%  | <0.001    |
|                                            | <b>ST2+AREG</b>                         | 5% vs 22%      | <0.001   | 10% vs 27%      | <0.001   | 15% vs 13%          | 0.191    | 83% vs 65%  | <0.001    |
|                                            | <b>REG3<math>\alpha</math>+AREG</b>     | 5% vs 25%      | <0.001   | 9% vs 30%       | <0.001   | 15% vs 13%          | 0.292    | 83% vs 62%  | <0.001    |
|                                            |                                         | CI 6 Month NRM | P-value* | CI 12 Month NRM | P-value* | CI 12 Month Relapse | P-value* | 12 Month OS | P-value** |
| <b>Systemically treated subset (n=321)</b> | <b>AREG</b>                             | 8% vs 27%      | <0.001   | 13% vs 31%      | <0.001   | 15% vs 13%          | 0.721    | 78% vs 61%  | <0.001    |
|                                            | <b>ST2+REG3<math>\alpha</math></b>      | 6% vs 37%      | <0.001   | 12% vs 39%      | <0.001   | 16% vs 11%          | 0.284    | 80% vs 51%  | <0.001    |
|                                            | <b>ST2+REG3<math>\alpha</math>+AREG</b> | 5% vs 27%      | <0.001   | 10% vs 32%      | <0.001   | 14% vs 14%          | 0.874    | 81% vs 60%  | <0.001    |
|                                            | <b>ST2</b>                              | 8% vs 33%      | <0.001   | 13% vs 39%      | <0.001   | 14% vs 14%          | 0.933    | 79% vs 52%  | <0.001    |
|                                            | <b>REG3<math>\alpha</math></b>          | 6% vs 25%      | <0.001   | 11% vs 30%      | <0.001   | 17% vs 12%          | 0.187    | 80% vs 62%  | <0.001    |
|                                            | <b>ST2+AREG</b>                         | 6% vs 24%      | <0.001   | 12% vs 29%      | <0.001   | 14% vs 14%          | 0.798    | 81% vs 62%  | <0.001    |
|                                            | <b>REG3<math>\alpha</math>+AREG</b>     | 6% vs 27%      | <0.001   | 11% vs 33%      | <0.001   | 15% vs 13%          | 0.710    | 80% vs 60%  | <0.001    |

\*Gray's test for comparing cumulative incidence function (CIF)

\*\* Log-rank test

**Supplemental Table 9: Day 28 overall response rate using concordance probability threshold, systemically treated subset of validation cohort (n=321)**

|                                         | <b>Day 28 Overall Response Rate (%)<br/>LR vs HR</b> | <b>Difference Between Groups</b> | <b>P-value</b> |
|-----------------------------------------|------------------------------------------------------|----------------------------------|----------------|
| <b>AREG</b>                             | 76% vs 61%                                           | 15%                              | 0.009          |
| <b>ST2+REG3<math>\alpha</math></b>      | 78% vs 52%                                           | 26%                              | <0.001         |
| <b>ST2+REG3<math>\alpha</math>+AREG</b> | 78% vs 61%                                           | 17%                              | 0.001          |
| ST2                                     | 75% vs 56%                                           | 19%                              | <0.001         |
| REG3 $\alpha$                           | 73% vs 66%                                           | 7%                               | 0.202          |
| ST2+AREG                                | 76% vs 63%                                           | 13%                              | 0.017          |
| REG3 $\alpha$ +AREG                     | 76% vs 62%                                           | 14%                              | 0.014          |

**Supplemental Table 10: Performance characteristics using threshold corresponding to 80% specificity**

|                                            |                                         | Threshold | % High Risk | Sensitivity | Specificity | PPV  | NPV  | Balanced Accuracy | Correctly classified |
|--------------------------------------------|-----------------------------------------|-----------|-------------|-------------|-------------|------|------|-------------------|----------------------|
| <b>Validation cohort (n=374)</b>           | <b>AREG</b>                             | 0.262     | 37%         | 0.66        | 0.70        | 0.34 | 0.90 | 0.68              | 69%                  |
|                                            | <b>ST2+REG3<math>\alpha</math></b>      | 0.305     | 18%         | 0.49        | 0.88        | 0.49 | 0.88 | 0.69              | 81%                  |
|                                            | <b>ST2+REG3<math>\alpha</math>+AREG</b> | 0.283     | 30%         | 0.60        | 0.76        | 0.37 | 0.89 | 0.68              | 74%                  |
|                                            | ST2                                     | 0.333     | 14%         | 0.39        | 0.92        | 0.52 | 0.87 | 0.66              | 82%                  |
|                                            | REG3 $\alpha$                           | 0.295     | 32%         | 0.54        | 0.73        | 0.32 | 0.87 | 0.64              | 69%                  |
|                                            | ST2+AREG                                | 0.272     | 29%         | 0.54        | 0.77        | 0.36 | 0.88 | 0.66              | 73%                  |
|                                            | REG3 $\alpha$ +AREG                     | 0.276     | 36%         | 0.63        | 0.71        | 0.33 | 0.89 | 0.67              | 69%                  |
|                                            |                                         | Threshold | % High Risk | Sensitivity | Specificity | PPV  | NPV  | Balanced Accuracy | Correctly classified |
| <b>Systemically treated subset (n=321)</b> | <b>AREG</b>                             | 0.262     | 39%         | 0.65        | 0.68        | 0.36 | 0.88 | 0.67              | 67%                  |
|                                            | <b>ST2+REG3<math>\alpha</math></b>      | 0.305     | 21%         | 0.49        | 0.87        | 0.51 | 0.86 | 0.68              | 79%                  |
|                                            | <b>ST2+REG3<math>\alpha</math>+AREG</b> | 0.283     | 34%         | 0.59        | 0.73        | 0.38 | 0.87 | 0.66              | 70%                  |
|                                            | ST2                                     | 0.333     | 16%         | 0.39        | 0.90        | 0.53 | 0.84 | 0.65              | 79%                  |
|                                            | REG3 $\alpha$                           | 0.295     | 33%         | 0.54        | 0.72        | 0.35 | 0.85 | 0.63              | 68%                  |
|                                            | ST2+AREG                                | 0.272     | 31%         | 0.54        | 0.75        | 0.37 | 0.86 | 0.64              | 70%                  |
|                                            | REG3 $\alpha$ +AREG                     | 0.276     | 38%         | 0.62        | 0.68        | 0.35 | 0.87 | 0.65              | 67%                  |

**Supplemental Table 11: Cumulative incidence of NRM and relapse and overall survival using threshold corresponding to 80% specificity**

|                                     |                                         | CI 12 month NRM | P-value | CI 12 Month Relapse | P-value | 12 Month OS | P-value |
|-------------------------------------|-----------------------------------------|-----------------|---------|---------------------|---------|-------------|---------|
| Validation cohort (n=374)           | <b>AREG</b>                             | 10% vs 34%      | <0.001  | 15% vs 12%          | 0.555   | 81% vs 59%  | <0.001  |
|                                     | <b>ST2+REG3<math>\alpha</math></b>      | 12% vs 49%      | <0.001  | 15% vs 9%           | 0.183   | 80% vs 42%  | <0.001  |
|                                     | <b>ST2+REG3<math>\alpha</math>+AREG</b> | 11% vs 37%      | <0.001  | 15% vs 11%          | 0.389   | 81% vs 55%  | <0.001  |
|                                     | ST2                                     | 13% vs 52%      | <0.001  | 15% vs 8%           | 0.180   | 79% vs 40%  | <0.001  |
|                                     | REG3 $\alpha$                           | 13% vs 32%      | <0.001  | 15% vs 12%          | 0.376   | 80% vs 60%  | <0.001  |
|                                     | REG3 $\alpha$ +AREG                     | 11% vs 33%      | <0.001  | 15% vs 13%          | 0.836   | 82% vs 58%  | <0.001  |
|                                     | ST2+AREG                                | 12% vs 36%      | <0.001  | 14% vs 13%          | 0.676   | 81% vs 55%  | <0.001  |
|                                     |                                         | CI 12 month NRM | P-value | CI 12 Month Relapse | P-value | 12 Month OS | P-value |
| Systemically treated subset (n=321) | <b>AREG</b>                             | 12% vs 36%      | <0.001  | 14% vs 14%          | 0.836   | 79% vs 56%  | <0.001  |
|                                     | <b>ST2+REG3<math>\alpha</math></b>      | 14% vs 51%      | <0.001  | 15% vs 9%           | 0.192   | 78% vs 40%  | <0.001  |
|                                     | <b>ST2+REG3<math>\alpha</math>+AREG</b> | 13% vs 38%      | <0.001  | 15% vs 11%          | 0.132   | 78% vs 54%  | <0.001  |
|                                     | ST2                                     | 16% vs 53%      | <0.001  | 15% vs 12%          | 0.493   | 76% vs 40%  | <0.001  |
|                                     | REG3 $\alpha$                           | 15% vs 35%      | <0.001  | 15% vs 12%          | 0.471   | 77% vs 57%  | <0.001  |
|                                     | REG3 $\alpha$ +AREG                     | 15% vs 37%      | <0.001  | 14% vs 14%          | 0.961   | 78% vs 53%  | <0.001  |
|                                     | ST2+AREG                                | 13% vs 35%      | <0.001  | 14% vs 14%          | 0.947   | 79% vs 55%  | <0.001  |

**Supplemental Table 12: Cumulative incidence of NRM by Minnesota Risk, systemically treated subset of validation cohort (n=321)**

|                                | NRM        | P value |
|--------------------------------|------------|---------|
| <b>Minnesota Standard Risk</b> | 18%        | -       |
| ST2+REG3 $\alpha$              | 12% vs 35% | <0.001  |
| AREG                           | 13% vs 23% | 0.022   |
| <b>Minnesota High Risk</b>     | 42%        | -       |
| ST2+REG3 $\alpha$              | 26% vs 48% | 0.116   |
| AREG                           | 8% vs 51%  | 0.011   |

**Supplemental Table 13: Area under the curve for algorithms by subsets**

Validation cohort patients

|                                                    |                                                         | <b>AUC for<br/>ST2+REG3<math>\alpha</math></b> | <b>AUC for<br/>AREG</b> | <b>p-value</b> |
|----------------------------------------------------|---------------------------------------------------------|------------------------------------------------|-------------------------|----------------|
| <b>Validation cohort<br/>(n=374)</b>               | Minnesota High Risk (n=53)                              | 0.689                                          | 0.780                   | 0.162          |
|                                                    | Minnesota Standard Risk (n=321)                         | 0.720                                          | 0.636                   | 0.035          |
|                                                    | LGI Involvement (n=109)                                 | 0.790                                          | 0.773                   | 0.678          |
|                                                    | Skin Only Involvement (n=199)                           | 0.629                                          | 0.563                   | 0.312          |
|                                                    | Post-Transplant Cyclophosphamide<br>Prophylaxis (n=133) | 0.717                                          | 0.595                   | 0.114          |
|                                                    | Systemically Treated (n=321)                            | 0.739                                          | 0.693                   | 0.144          |
|                                                    |                                                         | <b>AUC for<br/>ST2+REG3<math>\alpha</math></b> | <b>AUC for<br/>AREG</b> | <b>p-value</b> |
| <b>Systemically<br/>treated subset<br/>(n=321)</b> | Minnesota High Risk (n=52)                              | 0.679                                          | 0.780                   | 0.126          |
|                                                    | Minnesota Standard Risk (n=269)                         | 0.700                                          | 0.617                   | 0.052          |
|                                                    | LGI involvement (n=104)                                 | 0.777                                          | 0.768                   | 0.827          |
|                                                    | Skin Only Involvement(n=158)                            | 0.610                                          | 0.555                   | 0.427          |
|                                                    | Post-Transplant Cyclophosphamide<br>Prophylaxis (n=125) | 0.711                                          | 0.592                   | 0.129          |

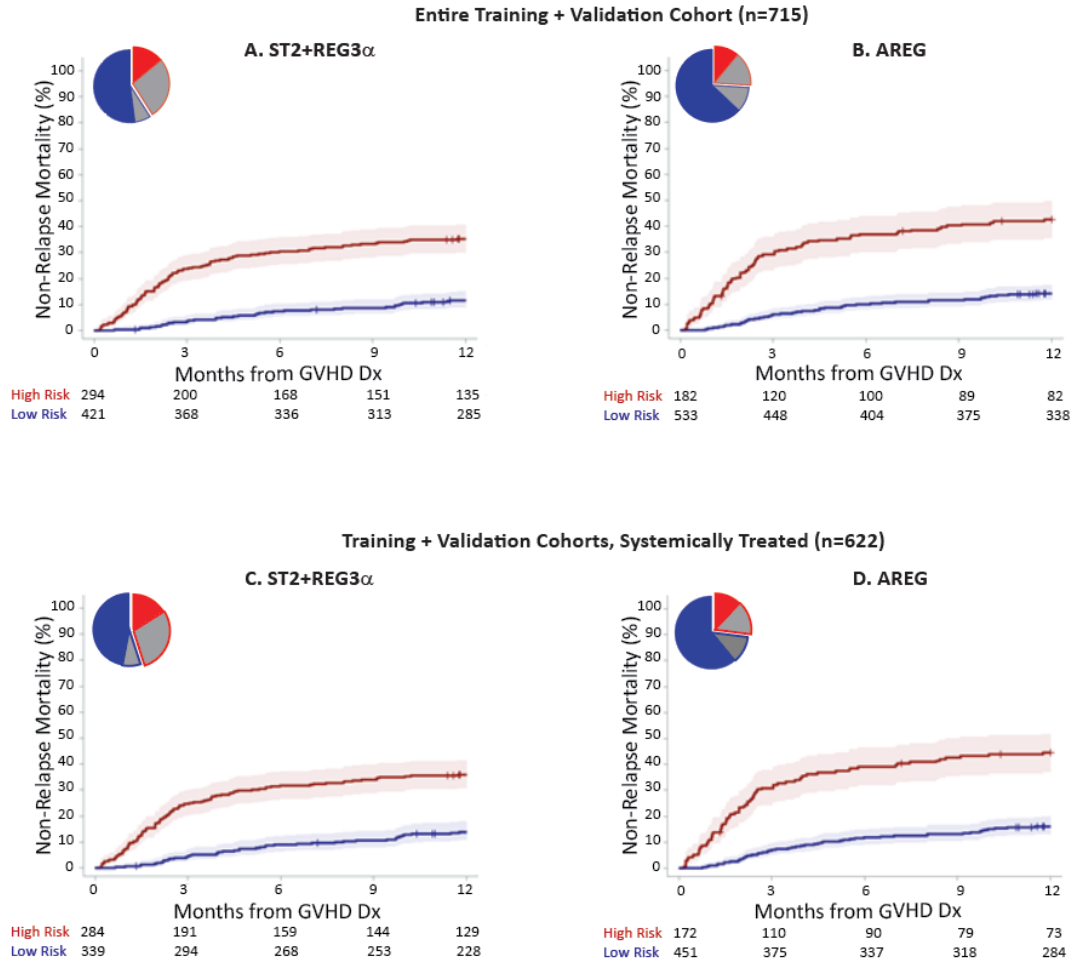

**Supplemental Figure 1: Cumulative incidence of 12-month NRM using risk groups identified by published algorithms and accompanying thresholds.**

Pie charts show the proportion of patients classified as high risk (HR, red border) and low risk (LR, blue border). The proportion correctly classified as HR or LR are shaded red or blue, respectively. The proportion incorrectly classified are shaded in gray. The cumulative incidence curves show 12-month NRM by risk group. **A and B:** Combined training + validation cohorts [n=715] **A.** ST2+REG3 $\alpha$  by Ann Arbor 1 (LR) vs 2/3 (HR). 12-month NRM 12% vs. 35% (p<0.001). **B.** AREG <33 pg/ml (LR) vs  $\geq$ 33 pg/ml (HR): 12-month NRM 14% vs. 43% (p<0.001). **C and D.** Systemically treated subset [n=622] **C.** ST2+REG3 $\alpha$  by Ann Arbor 1 (LR) vs 2/3 (HR). 12-month NRM 14% vs. 36% (p<0.001). **D.** AREG <33 pg/ml (LR) vs  $\geq$ 33 pg/ml (HR): 12-month NRM 16% vs. 45% (p<0.001).



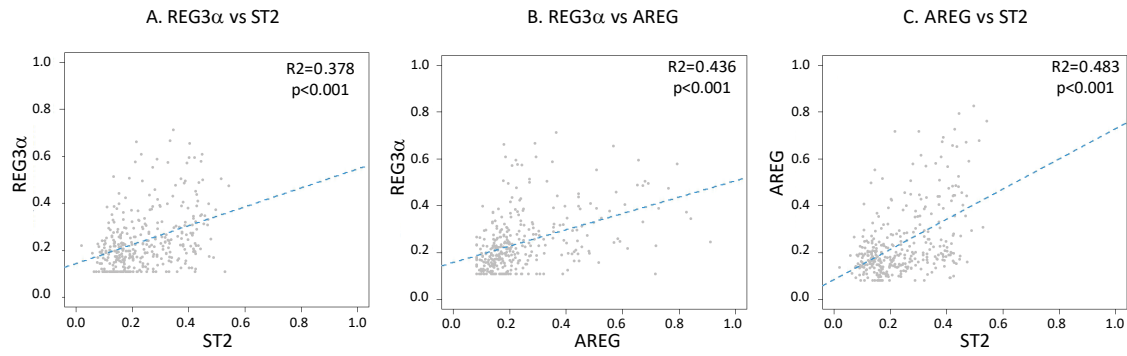

**Supplemental Figure 2: Correlation of predicted probabilities of AREG, REG3 $\alpha$ , and ST2 algorithms in the training cohort.**

**A.** REG3 $\alpha$  and ST2.  $R^2$  0.378,  $p<0.001$  **B.** REG3 $\alpha$  and AREG.  $R^2$  0.436,  $p<0.001$ . **C.** AREG and ST2.  $R^2$  0.489,  $p<0.001$ .
